# Supplementary material for: Effects of prolonged continuous computer gaming on physical and ocular symptoms and binocular vision functions in young healthy individuals
Source: PeerJ. 2019 Jun 4;7:e7050. doi: 10.7717/peerj.7050 (PMC6555390; doi:10.7717/peerj.7050)
Supplement: File S1 [file peerj-07-7050-s001.xlsx]

## Sheet: Sheet1
No	Age	Previous Rx (D)		NPC (mm)			NPA (cm)			Distance phoria (prism diopter)			Near phoria (prism diopter)			Distance phoria (prism diopter)				Near phoria (prism diopter)				Accommodative facility (cpm)			Vergence facility (cpm)			Blink rate (per minute)			Questinnaire (before; score 1-4)													Questinnaire (after; score 0-4))
Person	year	Right eye	Left eye	Before	After	Next morning	Before	After	Next morning	Before	After	Next morning	Before	After	Next morning	After 1h	After 2h	After 3h	After 4h	After 1h	After 2h	After 3h	After 4h	Before	After	Next morning	Before	After	Next morning	Before	After 1h	After 4h	Shoulder	Neck	Back	Headache	Red eyes	Eye strain	Itchy eyes	Tired eyes	Dry eyes	Tear eyes	Irritated eyes	Blurre vision	Aching eyes	Shoulder	Neck	Back	Headache
1	25	-2.75	-2.75	7	10	6	7	9	5.5	0	0	0	-2	-4	-1									15	11	15	15	12	15	14	3	8	0	0	0	0	0	0	0	0	0	0	0	0	0	3	3	0	0
2	20	-1.5	-1	8	9.5	8	7	8	7	-1	-1	0	-2	-4	-2	-1	-1	-1	-1	-2	-2	-3	-4	15	10	16	15	14	15	16	5	3	1	0	0	0	0	0	0	0	0	0	0	0	0	2	0	0	0
3	23	-6	-5.5	7	7.5	7	8	10	9	0	0	1	1	-1	0	0	0	0	0	1	1	-0.5	-1	10	11	13	18	16	20	15	5	5	0	0	0	0	0	0	0	0	0	0	0	0	0	4	0	0	0
4	23	-2.25	-2.5	9	12	8	8	14	7	0	1	0	0	-3	0									20	12	20	19	11	20	15	5	7	0	0	0	2	0	0	0	0	0	0	0	0	0	3	3	2	3
5	23	4.25	-4	9	11	7	9	10	9	-1	-2	-2	-6	-10	-13									13	13	19	19	15	20	16	12	12	0	0	0	0	1	1	1	0	1	0	1	2	0	4	2	1	1
6	31	-7.5	-8.25	9	11	8	9	11	9	-2	-2	-1	-10	-14	-10									7	10	14	15	10	14				0	1	1	0	1	0	0	1	1	0	0	1	0	3	3	1	2
7	24	0	0	8	9	8.5	6	8	8	-1	0	-2	-6	-9	-7									18	14	15	20	15	17	12	8	10	0	0	0	0	0	0	0	0	0	0	0	0	0	1	2	1	2
8	20	0	0	7.5	9	8	6	8	8	-1	-1	-1	-7	-9	-7	-1	-1	-1	-1	-7	-9	-9	-9	16	16	16	23	18	20	17	11	11	0	0	0	0	0	0	0	0	0	0	0	0	0	3	3	2	0
9	23	0.75	-1	6	7	6	6	8	6.5	-4	-4	-2	-8	-11	-8									18	16	19	19	16	18	18	15	15	1	1	0	1	0	2	2	2	3	0	2	1	2	2	3	3	3
10	30			8	9.5	6	9	10	9	-2	-2	-2	-10	-14	-12									16	15	16	17	16	16				1	1	0	1	0	1	1	1	1	1	1	1	0	3	3	1	3
11	23	-6.25	-5.75	7	9	7.5	10	11	8	1	3	1	-2	-2	1									17	15	20	18	18	20				1	1	0	0	0	0	0	1	0	0	0	0	0	1	1	1	2
12	22	-4.5	-5	10	11	6	9.5	11	9	-1	0	0	-2	0	-1									11	7	13	19	17	20	16	12	12	0	0	0	0	1	0	1	0	0	0	0	0	0	2	2	3	2
13	28	0	0	7	9	7	10	12.5	11	1	1	2	1	2	2									16	10	12	15	15	23				0	0	0	0	0	0	0	0	0	0	0	0	0	2	3	0	0
14	20	-6.25	-5.5	5.5	7.5	7	9.5	10	6	0	0	0	-1	-3.5	-2	0	0	0	0	-1	-2	-3	-3.5	15	15	17	19	17	24	11	5	5	0	0	0	0	0	0	0	0	0	0	0	0	0	2	2	0	0
15	23	-3.5	-3.5	10	11	11	9	10	10	0	-1	0	-1	-3	-1	0	0	0	1	-1	-1	-1	-3	13	13	16	20	20	22	16	12	10	0	0	0	0	0	0	0	1	2	0	0	2	0	2	3	1	3
16	20	0	0	5	8	8	7	11	7	-10	-14	-10	-13	-17	-13	12	14	14	14	15	17	17	17	17	13	19	14	14	19	16	5	11	3	1	0	0	0	1	0	2	3	0	0	1	1	3	4	4	1
17	23	-2	-6.25	8.5	11	9	10	11	9	-1	-1	-1	-7	-13	-7	-1	-1	-1	-1	-7	-7	-10	-13	15	14	15	14	11	12	14	11	3	0	0	0	0	1	0	0	1	1	0	0	0	0	0	1	0	0
18	19	-5.5	-5.75	4.5	9	5	6.5	8.5	7	0	0	0	0	-1	0	0	0	0	0	0	0	0	-1	13	11	15	19	20	20	28	11	15	0	0	0	0	0	0	0	1	0	0	0	0	0	1	2	0	0
19	35	-5.75	-5.75	9	11	9	8	9	8	-1	-1	-1	-10	-14	-12	-1	-1	-1	-1	-10	-10	-11	-14	16	15	16	15	13	15	13	10	10	0	0	0	0	0	2	0	2	0	0	0	0	2	2	2	0	3
20	25	0	0	8	9	8	9	9	9	-0.5	-0.5	0	-1.5	-3	-2	-0.5	-0.5	-0.5	-0.5	-1.5	-1.5	-1.5	-2.5	16	7	13	15	12	14	16	10	3	1	1	0	2	2	2	3	3	4	2	2	1	1	1	1	1	1
21	27	-5	-4.75	8	9	9	8	11	8	0	0	0	-2	-3	-3	0	0	0	0	-2	-2	-3	-3	9	7	7	14	13	13	16	11	11	2	2	2	2	2	0	2	2	2	2	2	1	0	3	3	2	2
22	20	0	0	6	7	7	6.5	8.5	7	0	0	0	-1	2	-2	0	0	0	0	-1	-1	-2	-2	19	16	20	21	19	21	11	3	7	1	1	1	1	2	2	1	3	2	1	1	1	2	3	3	2	2
23	20	0	0	7	8	7	7.5	7	8	1	0	0	-2	-4	-2									12	14	15	21	20	20				1	0	0	0	1	0	0	1	0	0	0	1	0	0	0	0	1
24	24	0	0	10.5	12	10	11	14	12	0	0	0	-6	-4	-6	0	0	0	0	-6	-6	-4	-4	10	11	10	8	0	10	18	12	6	0	0	0	0	0	0	0	0	0	0	0	0	0	0	0	0	0
25	20	0	0	7	8	8	7	7	7	0	0	0	-2	-4	-2	0	0	0	0	-2	-2	-2	-4	15	13	15	14	13	14	15	11	11	0	0	0	0	0	0	0	0	0	0	0	0	0	2	3	1	4
26	23	0	0	8	8	8	6	7	6	-1	-1	-1	-6	-5	-4	-1	-1	-1	-1	-6	-6	-5	-6	14	13	16	15	15	15	12	5	8	0	0	0	0	0	0	0	1	0	0	0	0	0	2	1	1	0
27	20	0	0	8	10	8	11	12	11	-2	-2	-2	-10	-14	-12	-2	-2	-2	-2	-8	-8	-10	-12	17	20	19	12	10	13	28	25	25	0	1	0	0	3	2	0	3	0	2	2	3	0	0	0	2	2
28	20	0	0	4.5	7	6	7.5	9	7	0	0	0	-1	-3	0	0	0	0	0	-1	-1	-2	-3	14	11	15	15	13	15	15	12	9	1	0	0	1	1	0	0	1	1	0	0	1	1	3	3	2	3
29	20	0	0	5	5.5	5	5	5	5	-2	-2	-2	-10	-12	-10	-2	-2	-2	-2	-10	-8	-12	-12	13	13	15	15	14	15	9	3	8	0	0	0	0	0	0	1	1	1	0	0	0	0	1	1	1	0
30	20	0	0	4.5	7	6	8.5	11	9	-1	-1	-1	-4	-10	-4	-1	-1	-1	-1	-5	-5	-7	-10	16	15	17	19	19	20	28	11	15	2	2	2	2	2	2	2	2	2	2	2	2	2	3	3	3	3
31	20	-1	-1	5	7	5	9	9	8	-2	-2	-2	-4	-7	-4	-2	-2	-2	-2	-4	-6	-6	-7	13	13	12	15	14	15	10	1	8	0	0	1	0	0	0	0	0	0	0	0	0	0	3	2	3	2
32	20	0	0	6	7	7	5	5	5	2	2	2	2	0	2	2	2	2	2	2	2	2	0	13	13	13	20	15	19	14	5	9	0	0	0	0	0	0	0	0	0	0	0	0	0	0	0	0	0
33	25	-3.5	-4.75	9	9.5	9	7	8	7	0	0	0	-1	-2	0	0	0	0	0	-1	-1	-2	-2	15	14	15	15	15	17	13	6	7	0	0	0	0	0	1	0	1	0	0	0	1	1	1	2	1	1
34	19	-2.25	-3	8	8	8	7	10	9	0	-2	0	-6	-10	10	0	-2	-2	-2	-6	-8	-8	-10	8	5	10	15	12	15	15	3	5	0	0	0	0	0	0	0	0	0	1	1	0	1	1	2	0	1
35	21	-1.75	-2	7	9	7	7.5	9	8	-1	0	-1	-8	-10	-6	-1	0	0	0	-6	-8	-9	-10	17	17	17	18	18	18	15	7	8	0	0	0	0	0	0	0	1	0	0	0	0	0	0	0	0	0
36	21	-2.5	2.25	7	9.5	7	7.5	8.5	7	1	1	1	3	0	2	1	1	1	1	1	1	0	0	20	21	20	18	17	17	15	1	7	0	0	0	0	0	0	1	1	0	0	0	0	0	2	2	0	3
37	24	-2.5	-1.75	8	8	7	7.5	8	7	0	0	0	-1	-3	0									21	19	20	23	20	21	14	7	9	0	0	0	0	0	1	1	1	0	0	0	0	0	2	2	1	1
38	20	-5.5	-5.25	6	7	6	6.5	6.5	6	0	0	0	-6	-4	-4	0	0	0	0	-6	-6	-4	-4	19	19	20	23	21	23	30	13	17	0	0	0	0	0	0	0	0	0	0	1	0	1	2	1	3	0
39	22	-6.5	-7	6.5	10	8	7.5	9.5	7	0	0	0	1	-3	0	0	0	0	0	1	1	-1	-3	13	12	17	20	16	26	17	6	6	2	3	0	4	3	3	3	3	3	4	1	2	3	2	3	2	4
40	22	0	0	5	7.5	8	7.5	7	7	-2	0	-1	-6	-8	-4	-2	-2	0	0	-6	-6	-8	-8	13	12	16	12	12	15	30	24	29	1	0	0	2	0	0	0	1	1	0	0	1	0	3	1	1	3
41	25	-4.25	-3.75	7	8	7	8	8	8	-0.5	-2	-1	-3	-8	-6	-1.5	-1.5	-2	-2	-6	-6	-8	-8	12	0	15	20	19	21	14	3	8	0	0	0	0	0	0	0	0	0	0	0	0	0	0	3	0	0
42	19	-2	-2.25	4.5	5.5	5	6	8	6	-2	-2	-2	-3	-8	-6	-2	-2	-2	-2	-5	-8	-8	-7	13	13	13	14	12	14	13	2	5	0	2	0	0	0	1	1	3	1	0	0	1	2	1	3	1	1
43	19	0	0	4	6	6	6.5	7	6	-1	-1	-1	-4	-5	-3	-1	-1	-1	-1	-4	-4	-4	-5	11	11	14	14	13	17	14	10	10	2	2	2	0	1	1	0	2	0	0	1	0	1	4	4	3	2
44	24	-2.75	-2.75	8	9	8	9	10	9	0	-2	0	1	-2	0									14	10	15	15	12	17				3	3	1	3	1	0	0	2	1	1	0	0	0	4	4	3	4
45	21	-2.5	2.25	7	9.5	8	7.5	8.5	8	1	1	1	3	0	2	1	1	1	1	1	1	0	0	20	21	21	18	17	17	15	1	7	0	0	0	0	0	0	1	1	0	0	0	0	0	2	2	0	3
46	27	0	0	9	9	9	9	9	9	0	0	0	-2	-2	-2									12	11	14	18	18	20				0	0	0	0	0	0	0	1	1	0	0	0	0	0	0	1	1
47	20	0	0	7	8	7	6.5	8	7	-2	-2	-2	-10	-13	-14									10	10	12	13	13	16				0	0	0	0	0	0	0	0	0	0	0	0	0	1	1	0	1
48	20	0	0	8	8	8	7	7	7	-1	-1	-1	-8	-8	-8									15	15	16	20	20	22				0	0	0	0	1	0	0	1	1	1	0	0	0	1	2	1	1
49	20	-1.5	-1	8	9.5	8	7	8	7	-1	-1	0	-2	-4	-2	-1	-1	-1	-1	-2	-2	-3	-4	15	10	16	15	14	15	16	5	3	1	0	0	0	0	0	0	0	0	0	0	0	0	2	0	0	0
50	22	-4.5	-5	10	11	6	9.5	11	9	-1	0	0	-2	0	-1									11	7	13	19	17	20	16	12	12	0	0	0	0	1	0	1	0	0	0	0	0	0	2	2	3	2
[truncated: 11 more columns]
